# Supplementary material for: Stretchable biofuel cells as wearable textile-based self-powered sensors
Source: Royal Society of Chemistry journal article supplement (doi:10.1039/c6ta08358g), 2016-01-01
Supplement: c6ta08358g1.pdf [file c6ta08358g1.pdf]

# Electronic Supplementary Information (ESI)

## Stretchable Biofuel Cells as Wearable Textile-based Self-Powered Sensors

Itthipon Jeerapan, Juliane R. Sempionatto, Adriana Pavinatto, Jung-Min You, Joseph Wang\*

*Department of NanoEngineering, University of California, San Diego La Jolla, CA 92093, USA. \*E-mail: josephwang@eng.ucsd.edu; Fax: +1 (858) 534 9553; Tel: +1 (858) 246 0128*

**Table S1** Optimization of PU layer for surface modification.

|                              | Printability                                                                               | Mechanical Properties                                                  |
|------------------------------|--------------------------------------------------------------------------------------------|------------------------------------------------------------------------|
| 10.0% PU in THF <sup>†</sup> | Hard to print, low viscosity, fast evaporation of solvent                                  | Poor, thickness not enough to stress applied                           |
| 12.5% PU in THF              | Easy to print, good viscosity                                                              | Poor, thickness not enough to stress applied                           |
| 15.0% PU in THF              | Printable, fast evaporation (bubbles) when cured under temperature higher than 50 °C.      | Good, enough thickness to stress applied even when stretched over 100% |
| 15.0% PU in DMF <sup>‡</sup> | Easy to print, can be cured at higher temperature, less curing time, no bubbles over 50 °C | Good, enough thickness to stress applied even when stretched over 100% |

<sup>†</sup> T<sub>b</sub> of THF = 66°C

<sup>‡</sup> T<sub>b</sub> of DMF = 153°C

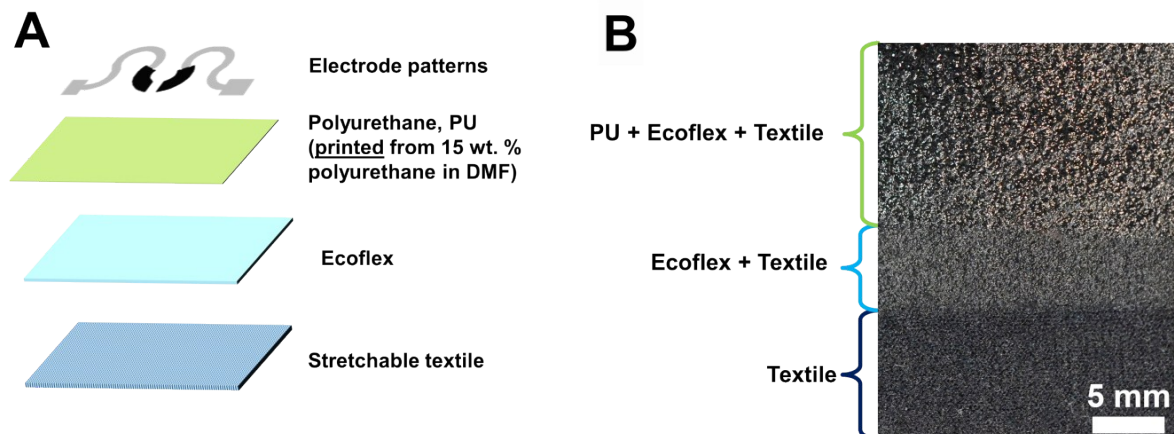

**Figure. S1.** The fabrication process of the stretchable BFC device. (A) The process starts by delaminating the Ecoflex and PU layers on the stretchable Nylon- Spandex textile and then screen-printing the designed pattern onto the modified surface. (B) Optical image shows the surface of the pristine textile and modified layers.

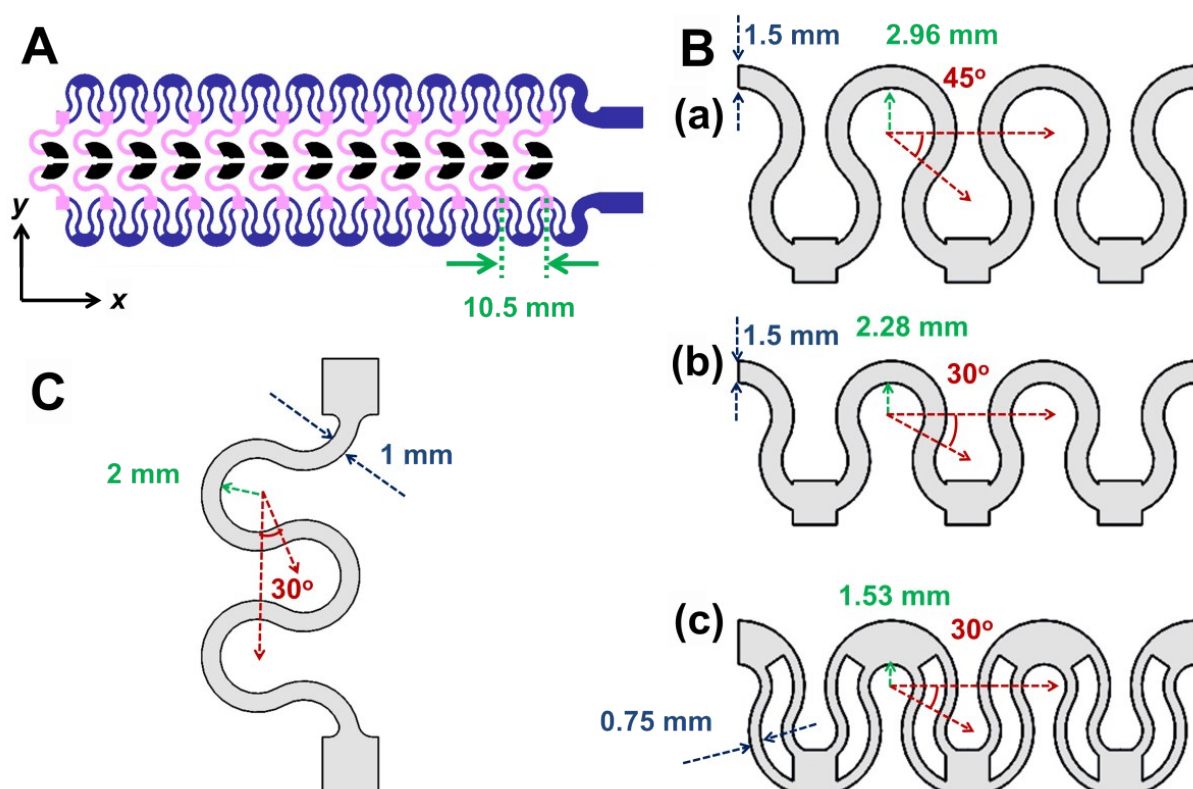

**Figure S2.** Illustration of the designs. (A) An example of designed pattern for stretchable BFC array. This design is for accommodating multi-directions of external strains: x-direction (blue) and y-direction (pink). (B) Designed patterns for accommodating external strain in x-direction: (a) 45-degree design ( $45^\circ$ ); (b) 30-degree design ( $30^\circ$ ); and (c) separated trace design. (C) Designed patterns for accommodating external strain in y-direction.

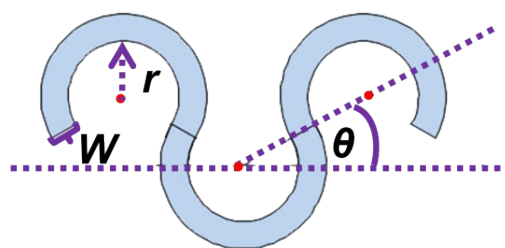

**Figure S3.** Definition of parameters for the arc of the serpentine interconnects. The parameters are connecting angle ( $\theta$ ), width ( $W$ ), and inner radius ( $r$ ).

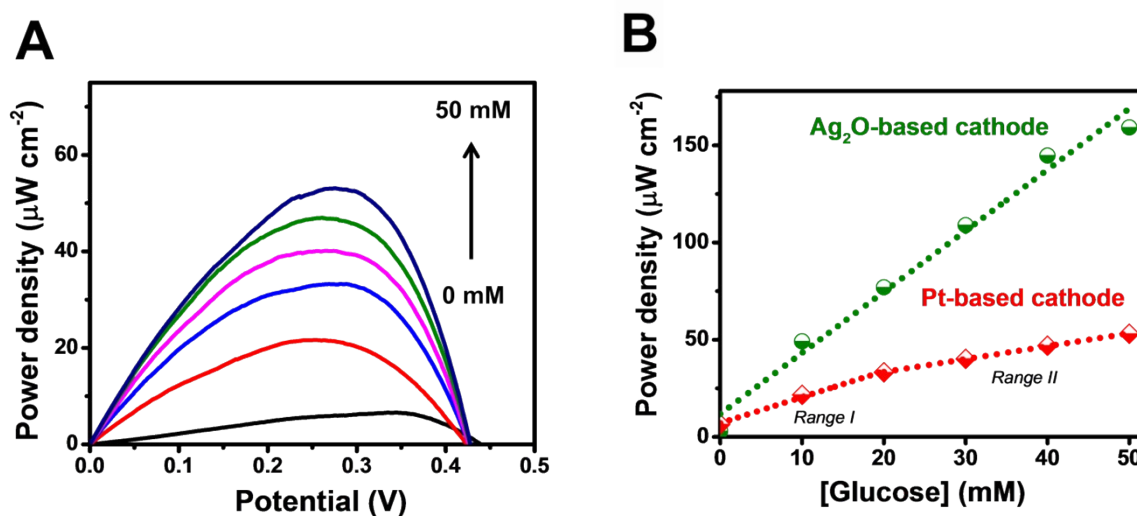

**Figure S4.** (A) Plot of power density vs potential plots of the assembled GOx bioanode/Pt-based cathode BFC when varying glucose concentrations (0–50 mM) in 0.1 M KPBS (pH 7.0). (B) Corresponding power–concentration calibrations obtained from glucose BFCs with different cathodes: Ag<sub>2</sub>O-based cathode (green circle) and Pt-based cathode (red square).

### Preparation of Pt-based cathode

Stretchable CNT ink was used as underline layer of cathode. After printed and dried, the cathode was modified by drop casting solution of 5  $\mu\text{L}$  of 5  $\text{mg mL}^{-1}$  OH-CNTs dispersed in 10  $\text{mg mL}^{-1}$  of Platinum black ethanol solution. Then, 2  $\mu\text{L}$  of 0.5% Nafion<sup>®</sup> solution was dropped after overnight.

**Table S2.** BFC performance obtained from Ag<sub>2</sub>O-based and Pt-based cathodes

| Cathode                         | Sensitivity ( $\mu\text{W cm}^{-2} \text{ mM}^{-1}$ ) | R <sup>2</sup> |
|---------------------------------|-------------------------------------------------------|----------------|
| Ag <sub>2</sub> O-based cathode | $3.14 \pm 0.20$                                       | 0.980          |
| Pt-based cathode                | Range I: $1.34 \pm 0.10$                              | 0.988          |
|                                 | Range II: $0.66 \pm 0.01$                             | 0.999          |

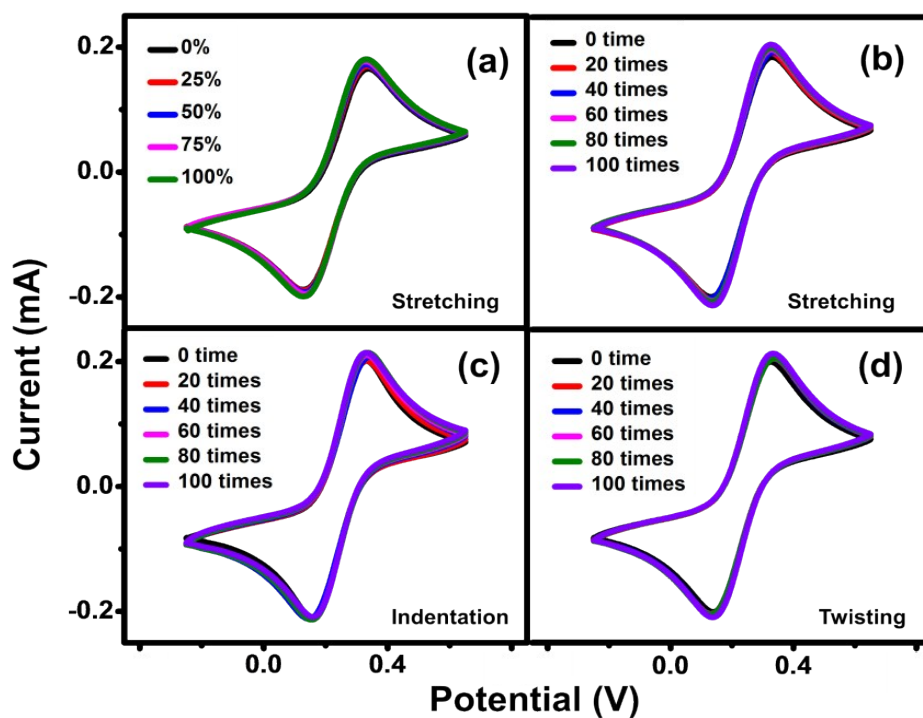

**Figure S5.** CVs recorded when (a) applying increasing levels of strain (repeated 20 cycles for each) from 0 to 100% with increments of 25%. (b) applying 20 repeated 100% stretching cycles for a total of 100 iterations (c) 20 repeated indentations (5 mm) for a total of 100 repetitions (d) 20 torsional 180° twisting cycles for a total of 100 iterations. The working electrode is the stretchable CNT-based electrode.

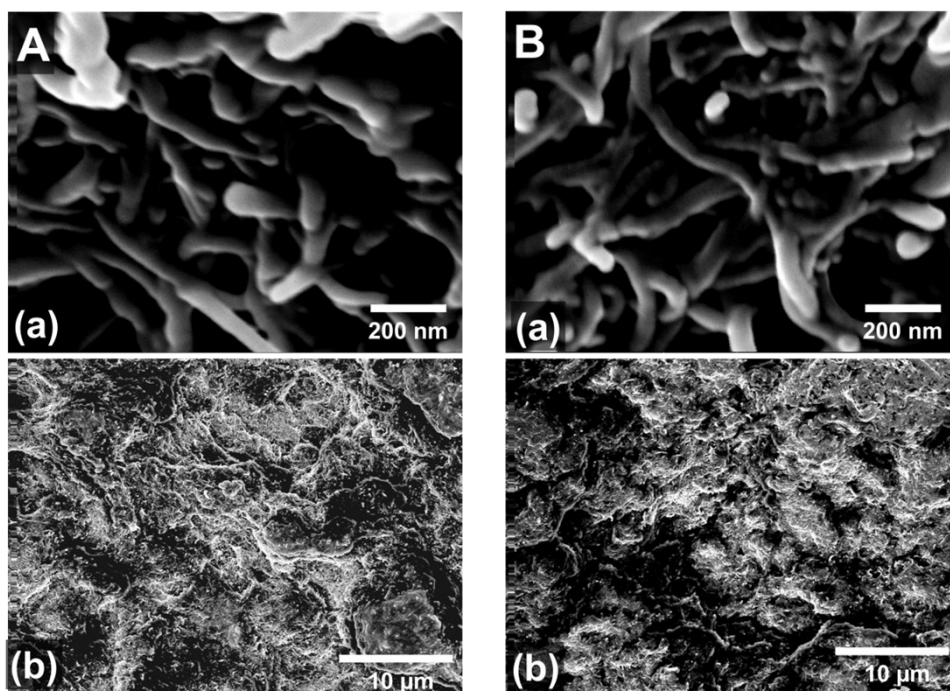

**Figure S6.** SEM image of stretchable CNT-based anode (A) before and (B) after repeated stretching at 100% strain for 100 times. (a) High magnification and (b) low magnification SEM images.



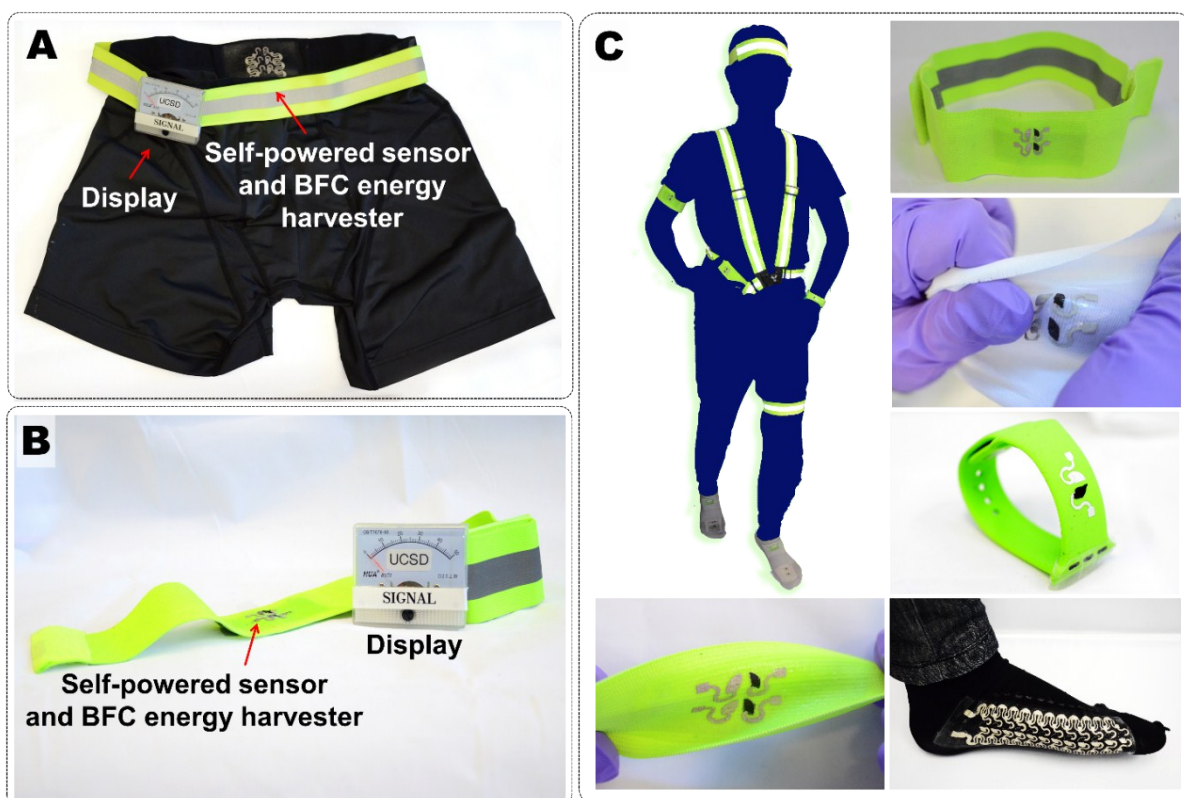

**Figure S7.** The fully integrated system for wearable lactate biosensing showing the “scavenge-sense-display” concept. The stretchable BFC arrays were printed on (A) the wearable underwear textile and (B) the stretchable strap. (C) Illustration of a ‘green’ model and photographs of wearable energy harvesting system and self-powered BFC array printed on conventional textiles and different body-worn accessories, such as stretchable headbands, straps and socks .

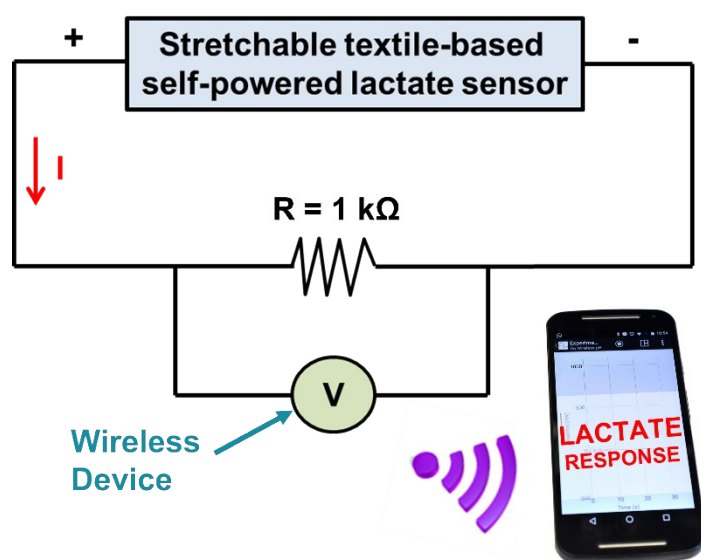

**Figure S8.** The scheme shows the circuit system for lactate monitoring. This allows reading and real-time wireless recording by using a smartphone and a compact wireless device. The compact wireless device with an integrated rechargeable battery was used to perform on-body measurements.

**Video 1. and Video 2.** Videos showing applications of repeated linear and multi-dimensional strains, bending, twisting, and indentation to the stretchable textile-based devices.

**Video 3.** Versatility of our approach to obtain mechanical compliant BFC arrays for energy harvesting and wearable self-powered sensing systems. The integrated “scavenge-sense-display” system was demonstrated toward lactate solution.

**Video 4.** Applicability to sock-based BFC and self-powered biosensor and mechanically compliant operations was demonstrated on a human foot.
